# Supplementary material for: Fe–Fe3C/C microspheres as a lightweight microwave absorbent
Source: Royal Society of Chemistry journal article supplement (doi:10.1039/c6ra02787c), 2016-01-01
Supplement: c6ra02787c1.pdf [file c6ra02787c1.pdf]

### Supporting Information

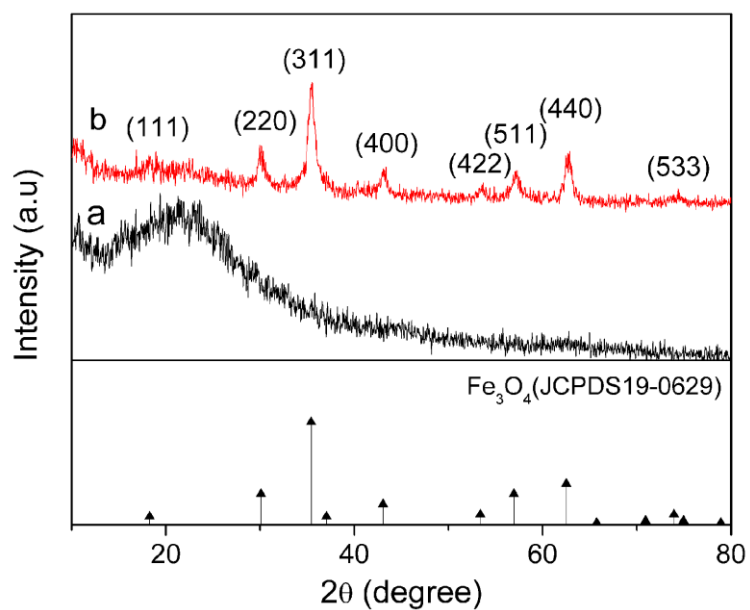

**Fig. S1** XRD patterns of (a) hydrochar and (b) hydrochar coated with  $\text{Fe}_3\text{O}_4$ .

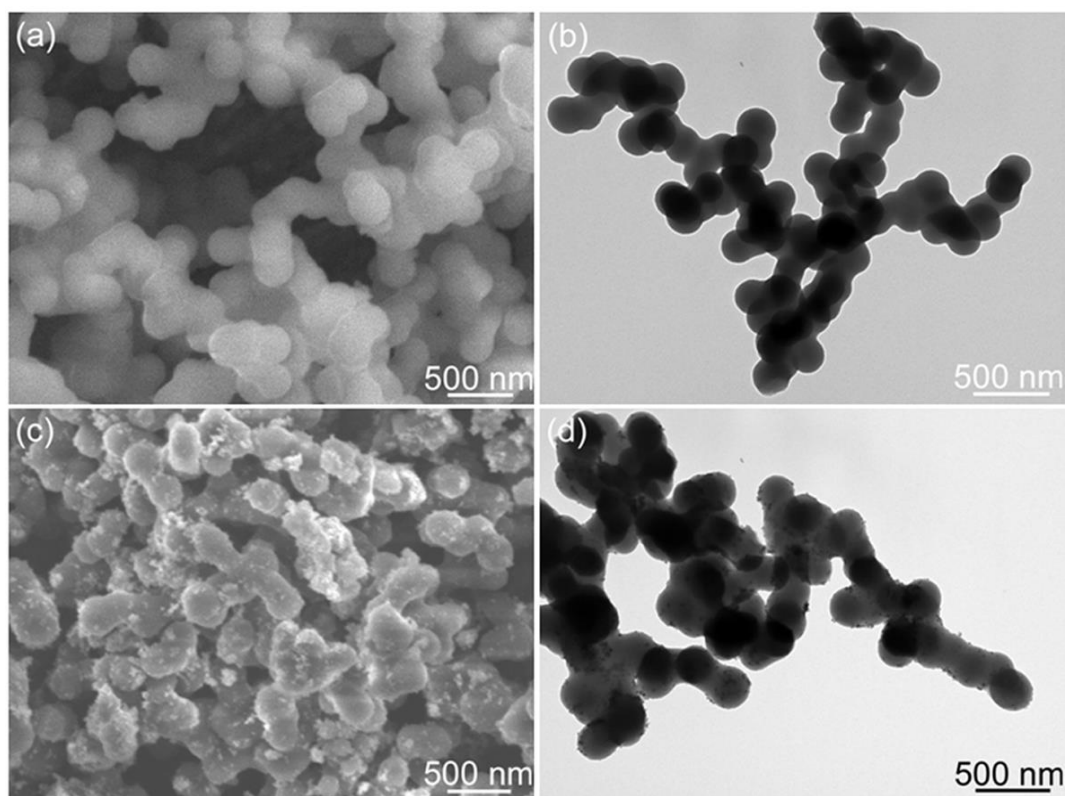

**Fig. S2** SEM and TEM images of (a and b) hydrochar, (c and d) hydrochar coated with  $\text{Fe}_3\text{O}_4$  nanoparticles.
